# Supplementary material for: Sex-Specific Associations between Serum IL-16 Levels and Sarcopenia in Older Adults
Source: MDPI journal article supplement (doi:10.3390/nu15163529), 2023-08-10
Supplement: s1 [file s1]

Supplementary Table.S1 Detected levels of cytokines/chemokines in the serum samples from all study participants (pg/ml). Data of study groups based on different ASMI cut-off values analyzed using descriptive statistics. GDF2 was not detectable in all samples (ND).

|          |        | Control group<br>( <i>n</i> = 24) | Case group<br>( <i>n</i> = 56) | <i>p</i> |
|----------|--------|-----------------------------------|--------------------------------|----------|
| TNFSF13  | Male   | 3201.96±22456.69                  | 2908.84±1504.67                | 0.711    |
|          | Female | 3272.84±1761.21                   | 2422.09±1233.46                | 0.161    |
| TNFSF13B | Male   | 2.12±1.75                         | 2.65±2.07                      | 0.294    |
|          | Female | 2.81±2.32                         | 2.26±2.32                      | 0.243    |
| BDNF     | Male   | 79.79±73.73                       | 60.04±59.28                    | 0.385    |
|          | Female | 86.21±61.19                       | 70.12±58.00                    | 0.263    |
| GDF2     | Male   | ND                                | ND                             | ND       |
|          | Female |                                   |                                |          |
| EGF      | Male   | 44.17±33.83                       | 37.53±23.48                    | 0.662    |
|          | Female | 36.05±35.57                       | 51.68±35.72                    | 0.128    |
| CCL24    | Male   | 272.80±202.16                     | 217.14±113.09                  | 0.788    |
|          | Female | 229.08±114.00                     | 252.37±111.85                  | 0.604    |
| FABP-3   | Male   | 2220.05±1426.11                   | 2666.85±2271.41                | 0.822    |
|          | Female | 3359.66±3101.11                   | 2616.19±1976.12                | 0.397    |
| CNPY2    | Male   | 12.01±9.60                        | 16.65±10.42                    | 0.398    |
|          | Female | 15.45±11.47                       | 11.67±8.00                     | 0.542    |
| ILCF     | Male   | 39.33±21.69                       | 43.42±22.24                    | 0.471    |
|          | Female | 53.13±26.68                       | 40.44±17.26                    | 0.202    |
| HGF      | Male   | 200.86±133.85                     | 206.96±155.68                  | 0.854    |
|          | Female | 199.51±135.92                     | 232.55±194.75                  | 0.801    |
| IL-2R    | Male   | 3795.60±3324.22                   | 2790.89±2808.14                | 0.202    |
|          | Female | 2486.01±1695.64                   | 3530.12±2290.41                | 0.172    |

|             |        |                |               |       |
|-------------|--------|----------------|---------------|-------|
| IL-13       | Male   | 3.09±2.59      | 4.37±2.35     | 0.192 |
|             | Female | 5.89±4.87      | 4.05±3.46     | 0.444 |
| IL-16       | Male   | 181.99±92.25   | 112.33±65.24  | 0.013 |
|             | Female | 98.77±62.20    | 159.38±75.18  | 0.025 |
| IL-20       | Male   | 9.43±16.19     | 14.29±21.79   | 0.552 |
|             | Female | 6.63±7.94      | 11.26±21.38   | 0.954 |
| LIF         | Male   | 28.05±18.99    | 26.55±12.90   | 0.840 |
|             | Female | 40.40±16.27    | 25.32±13.78   | 0.007 |
| ALOX15      | Male   | 53.74±44.21    | 57.38±42.80   | 0.632 |
|             | Female | 55.05±54.19    | 54.10±40.61   | 0.623 |
| CCL8        | Male   | 7.19±2.85      | 6.94±3.80     | 0.614 |
|             | Female | 6.26±3.46      | 6.39±3.02     | 0.716 |
| CCL7        | Male   | 35.83±22.28    | 39.41±19.31   | 0.512 |
|             | Female | 47.22±21.11    | 35.77±19.66   | 0.101 |
| MDC         | Male   | 93.80±40.39    | 74.20±41.58   | 0.195 |
|             | Female | 99.03±47.92    | 88.05±45.17   | 0.556 |
| MIF         | Male   | 36.05±19.10    | 40.46±21.18   | 0.381 |
|             | Female | 36.83±12.43    | 41.79±18.79   | 0.512 |
| CXCL9       | Male   | 27.12±19.24    | 53.64±56.82   | 0.312 |
|             | Female | 36.50±25.46    | 39.10±28.55   | 0.955 |
| MMP-1       | Male   | 1017.48±848.30 | 736.61±672.35 | 0.312 |
|             | Female | 950.41±743.85  | 908.65±839.42 | 0.818 |
| MMP-13      | Male   | 23.01±16.88    | 23.70±16.48   | 0.897 |
|             | Female | 24.98±16.87    | 18.07±13.97   | 0.287 |
| NGF $\beta$ | Male   | 2.14±3.14      | 1.95±2.10     | 0.428 |
|             | Female | 1.95±1.36      | 1.47±1.65     | 0.101 |

|         |        |                   |                   |       |
|---------|--------|-------------------|-------------------|-------|
| PDGF-BB | Male   | 175.57±54.02      | 177.76±105.69     | 0.699 |
|         | Female | 134.39±83.63      | 121.02±114.65     | 0.424 |
| PlGF-1  | Male   | 14.16±17.35       | 19.02±20.64       | 0.321 |
|         | Female | 13.73±10.63       | 14.33±15.48       | 0.782 |
| SCF     | Male   | 11.56±5.53        | 9.97±7.04         | 0.439 |
|         | Female | 12.96±9.16        | 12.27±7.79        | 0.859 |
| TNF-RII | Male   | 168.36±80.62      | 152.25±61.73      | 0.637 |
|         | Female | 170.99±49.35      | 162.07±65.00      | 0.634 |
| VEGFA   | Male   | 873.15±800.37     | 693.66±461.40     | 0.946 |
|         | Female | 767.57±526.11     | 780.49±650.49     | 0.758 |
| VEGFD   | Male   | 4.91±2.80         | 5.37±3.62         | 0.730 |
|         | Female | 8.02±5.50         | 6.94±6.52         | 0.249 |
| ICAM-1  | Male   | 56011.18±36336.52 | 50566.26±31886.30 | 0.713 |
|         | Female | 50637.96±24118.06 | 70510.10±48518.62 | 0.263 |
| MMP-3   | Male   | 659.26±337.26     | 732.63±307.73     | 0.329 |
|         | Female | 647.29±348.23     | 739.16±369.46     | 0.484 |
| MMP-9   | Male   | 3570.88±1909.73   | 3156.19±2020.59   | 0.567 |
|         | Female | 2382.85±1659.76   | 3462.13±2020.42   | 0.133 |
| VCAM-1  | Male   | 23271.60±14509.26 | 18730.00±94454.78 | 0.423 |
|         | Female | 20852.71±18369.49 | 18016.40±9909.41  | 0.956 |
